# Supplementary material for: Ribosome hibernation factor promotes Staphylococcal survival and differentially represses translation
Source: PubMed Central journal article supplement — Nucleic Acids Res. 2016 Mar 21;44(10):4881–93. doi: 10.1093/nar/gkw180 (PMC4889938; doi:10.1093/nar/gkw180), 2016-03-21
Supplement: supp_gkw180_nar-03487-r-2015-File010.pdf [file supp_gkw180_nar-03487-r-2015-File010.pdf]

## SUPPLEMENTARY DATA

Basu A., and Yap, M.-N. F. (2016) Ribosome hibernation factor promotes *Staphylococcal* survival and differentially represses translation.

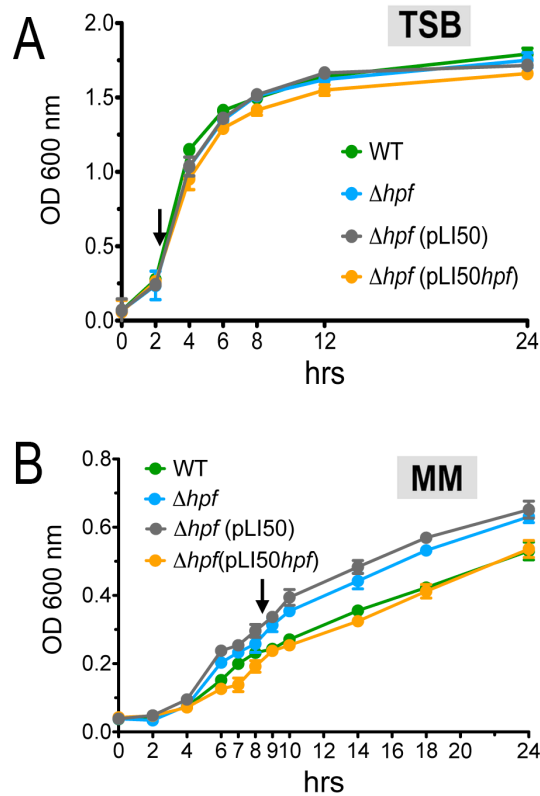

**Figure S1. Growth curves of the wild-type and  $hpf_{Sa}$  mutant.** (A) Tryptic soy broth (TSB) cultures. (B) Minimal medium (MM) cultures. No significant difference in growth rate was observed in TSB cultures, whereas the wild-type and complementing strain were delayed in entering the stationary phase compared with the  $hpf_{Sa}$  mutant. Error bars indicate the standard deviation of four independent experiments. An arrowhead denotes time point when cells were harvested for ribosome profiling.

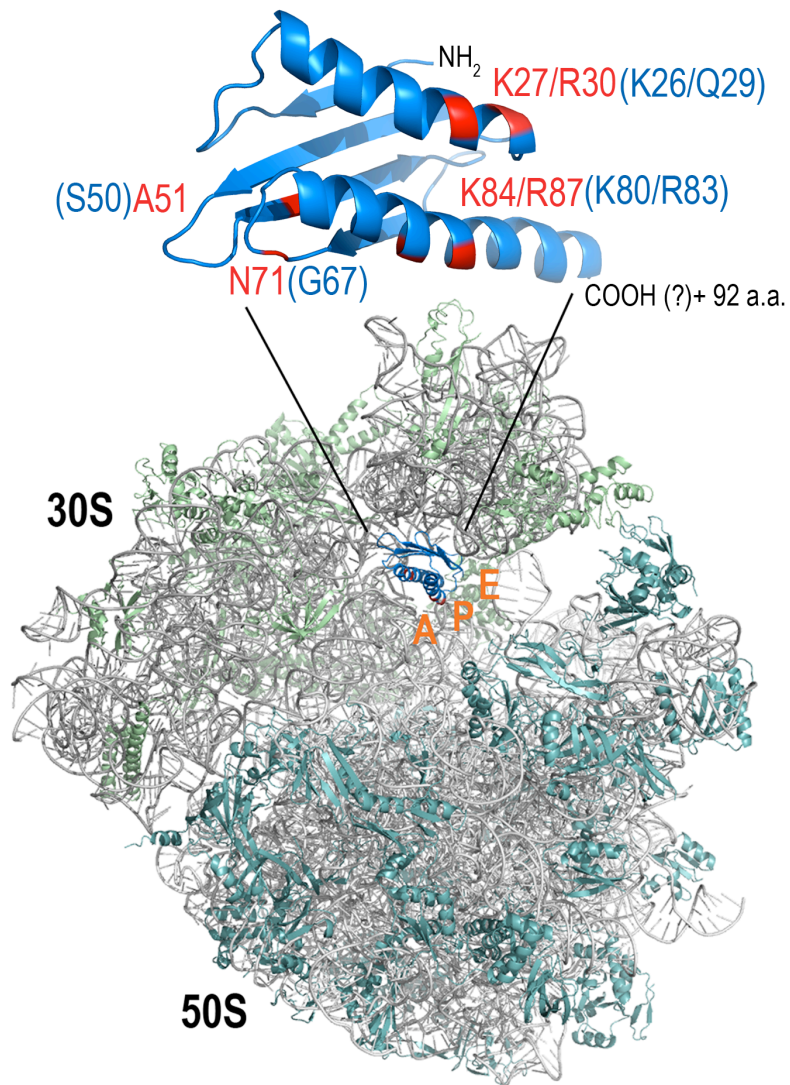

**Figure S2. Illustration of the *E. coli* HPF<sub>Ec</sub> in complex with a *T. thermophilus* ribosome.** The two conserved basic patches on the  $\alpha$ -helices are highlighted in red. K27, R30, K84, R87 are the numbering of *S. aureus* HPF<sub>Sa</sub> equivalent to *E. coli* counterparts (blue). Additional non-essential residues (A51, N71) located outside of the  $\alpha$ -helices are indicated. The fold of the HPF<sub>Sa</sub> C-terminal tail is unknown. Ribosomal A-, P-, and E-sites are highlighted in orange. Structural information was extracted from PDB 4V8H (1).

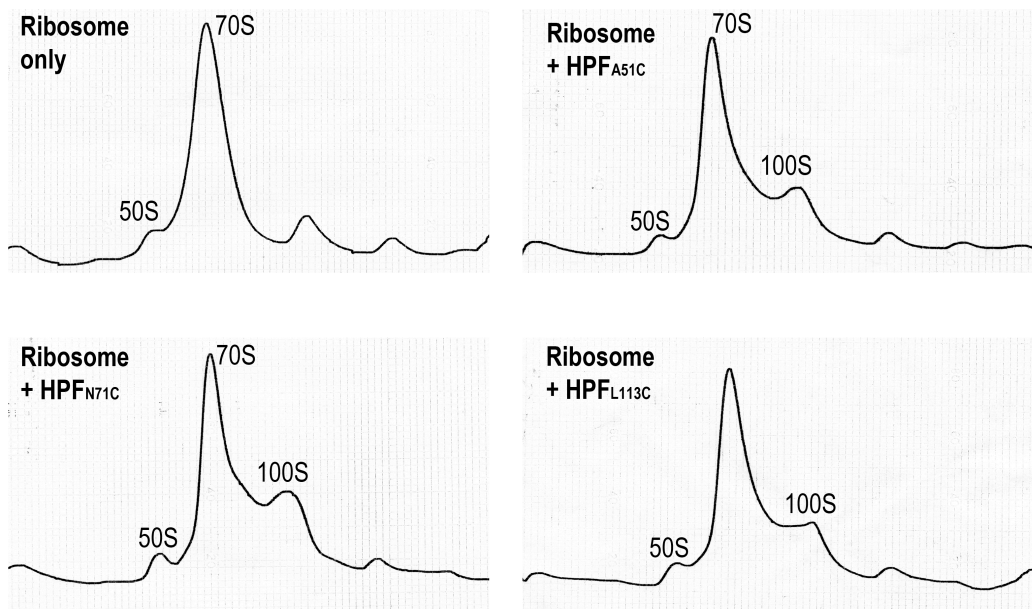

**Figure S3. Mutations outside of the  $\alpha$ -helices do not disrupt 70S dimerization.** 5-25% sucrose density gradient profiles of salt-washed ribosome isolated from *S. aureus* *hpf* null strain with a mixture of 1:1 molar ratio of ribosomes to HPF<sub>Sa</sub> mutant variants. In vitro 100S complex formation of mutant variants is comparable to the wild-type HPF<sub>Sa</sub> (see Fig. 4). Residues A51 and N71 are predicted to locate on the  $\beta$ -sheet and flexible loop, respectively (see Fig. S2). The position of L113 is unknown as it resides at the C-terminal extension that is absent in HPF<sub>Ec</sub>.

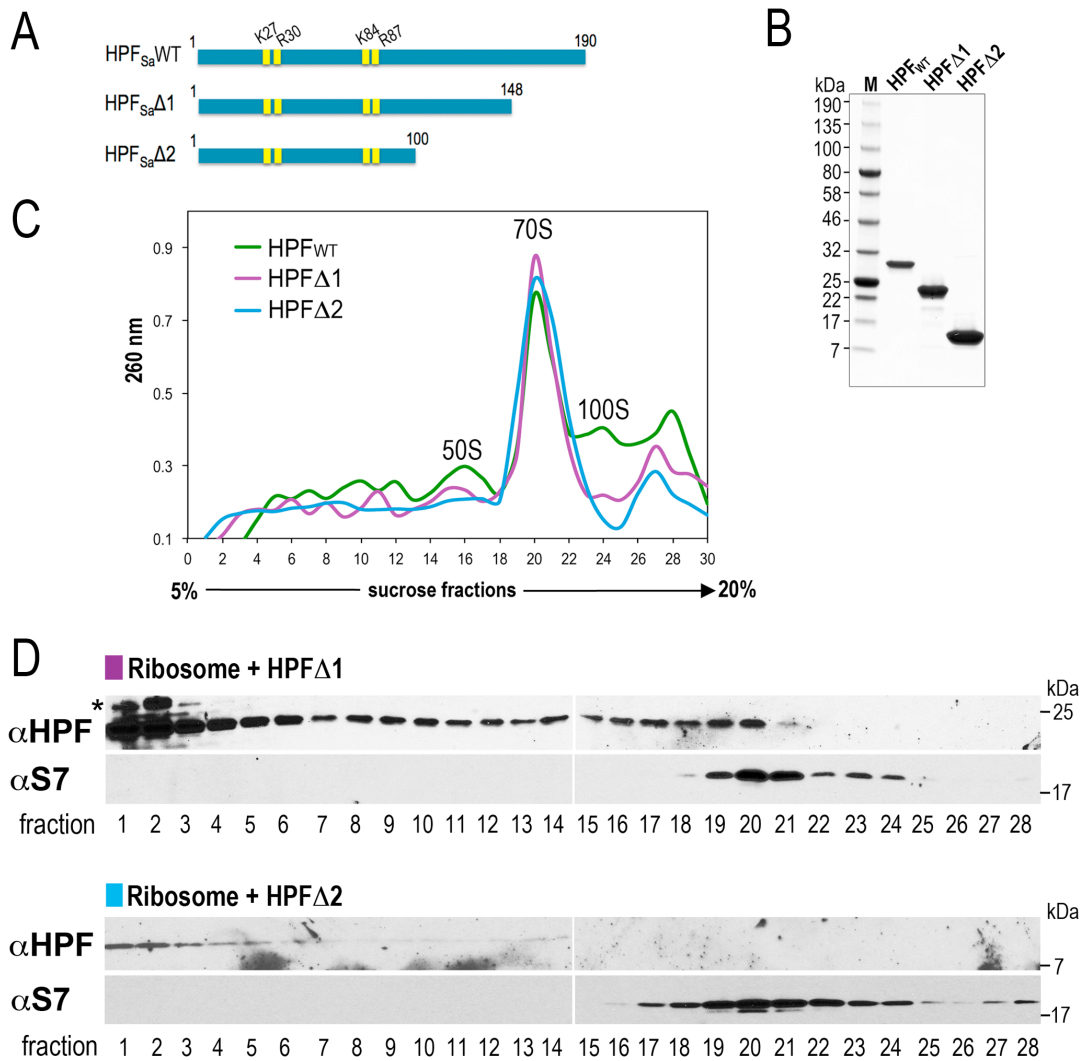

**Figure S4. The C-terminal extended segment of HPF<sub>Sa</sub> is necessary for ribosome binding.** (A) Diagram showing the HPF<sub>Sa</sub> deletion mutants. (B) SDS-PAGE showing the purity of affinity tag-free HPF<sub>Sa</sub>. (C) Sucrose density gradient fractionation confirms that both HPF<sub>Sa</sub>Δ1 and HPF<sub>Sa</sub>Δ2 failed to elicit 100S complex formation. An equimolar ratio of ribosome to HPF<sub>Sa</sub> protein was used. (D) Western blots showing that HPF<sub>Sa</sub>Δ1 is loosely associated with the ribosome and HPF<sub>Sa</sub>Δ2 completely loses its binding to the ribosome. The large truncation reduces the antigenic reactivity to anti-HPF<sub>Sa</sub>, thus explaining the weaker signal. Anti-HPF<sub>Sa</sub> was used in 1:1,000 and 1:500 dilutions for HPF<sub>Sa</sub>Δ1 and HPF<sub>Sa</sub>Δ2, respectively. Each fraction corresponds to the sucrose density fractions obtained in panel C. An asterisk denotes non-specific crossreaction.



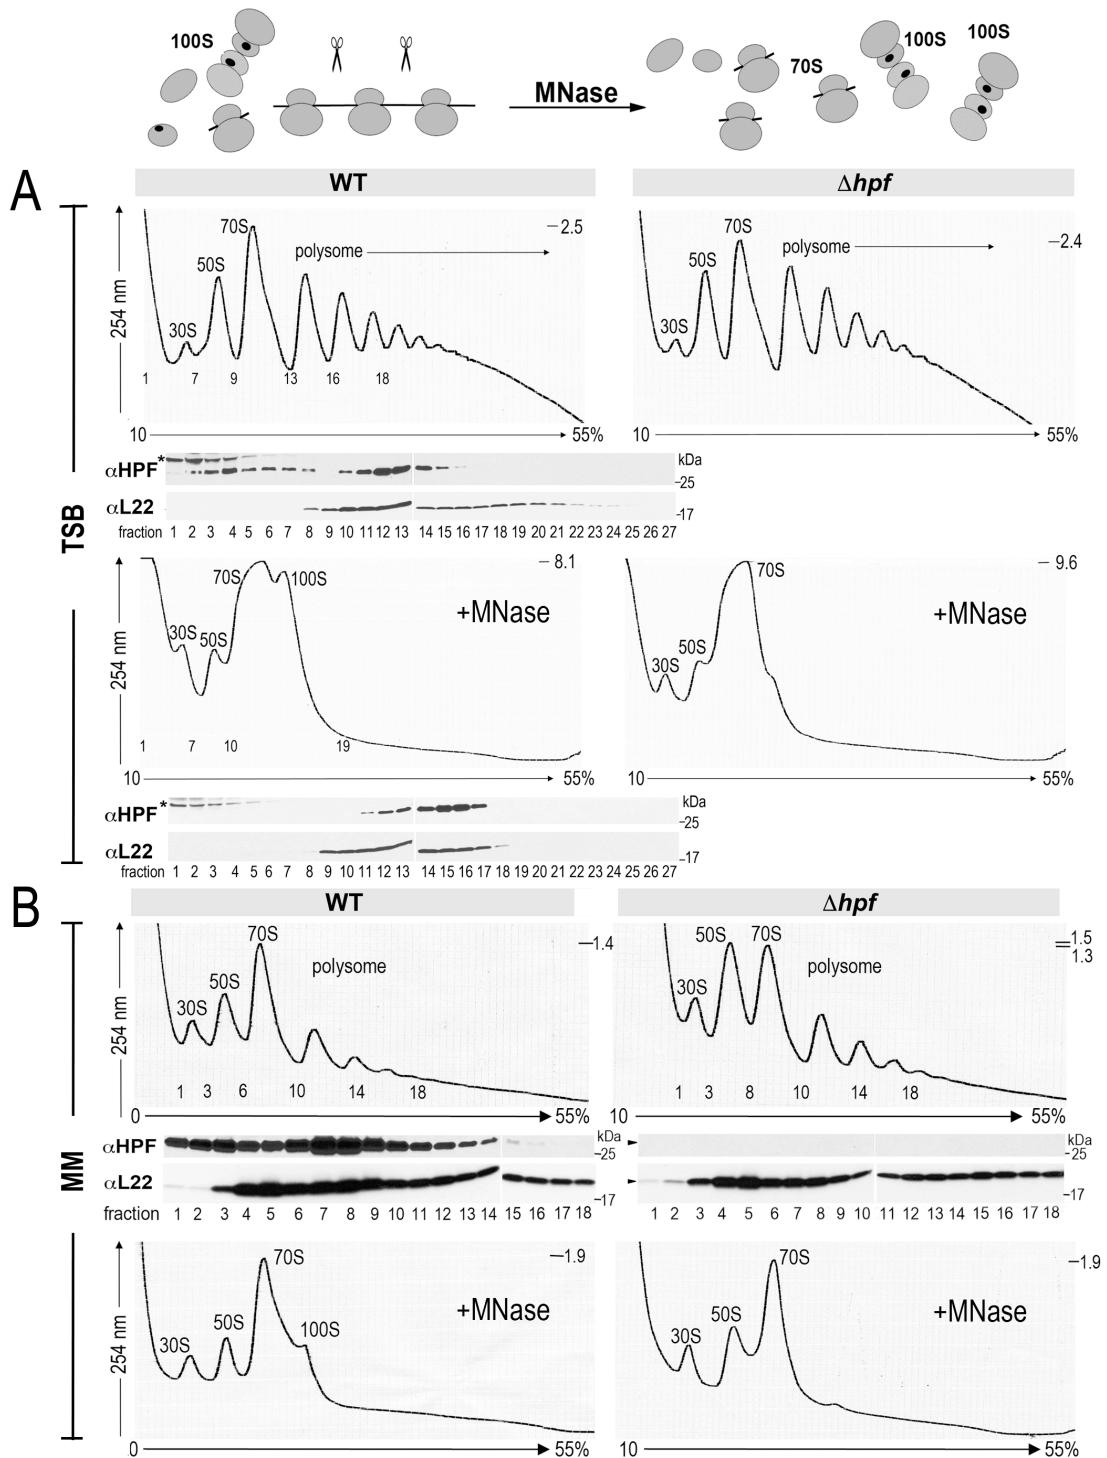

**Figure S5. Sucrose density gradient plots of ribosome profiling samples before and after micrococcal nuclease (MNase) treatment. (A) Polysome profiles from TSB samples. (B) Polysome profiles from MM samples. 100S ribosomes are resistant to MNase digestion, showing as distinct peaks in the wild-type strain. In the MNase-free samples, the disome and**

the 100S ribosome peaks are indistinguishable on sucrose gradient due to near identical masses. Distributions of ribosomes and ribosomal subunits were analyzed on a 10-55% sucrose gradient. The middle panels between the plots are immunoblots showing the distribution of HPF<sub>Sa</sub>. The 50S ribosomal subunit protein L22 is a marker control for fractionation. Anti-HPF<sub>Sa</sub> and anti-L22 were used in 1:8,000 and 1:1,500 dilutions, respectively. An asterisk indicates a non-specific band. Two-minute chloramphenicol pretreatment was conducted to capture polysomes. The treatment may artificially promote 30S-to-30S dimerization and produces a subpopulation of 30S dimers (0.85 MDa±0.15) that shares an overlapping peak with the 50S subunit (0.9 MDa±0.07), explaining the association of HPF<sub>Sa</sub> with the “50S peak” on the Western blots. The association of HPF<sub>Sa</sub> to the 30S monomer and 30S dimer may be more labile than to the 70S and 100S ribosomes, and dissociation may occur upon a low degree of rRNA cleavage by MNase (2). The elevated 30S and 50S peaks in the  $\Delta hpf_{Sa}$  MM culture may be the products of the post-termination disassembly of 70S ribosomes because a lack of HPF<sub>Sa</sub> (and 100S ribosomes) renders more ribosomes to engage in translation.

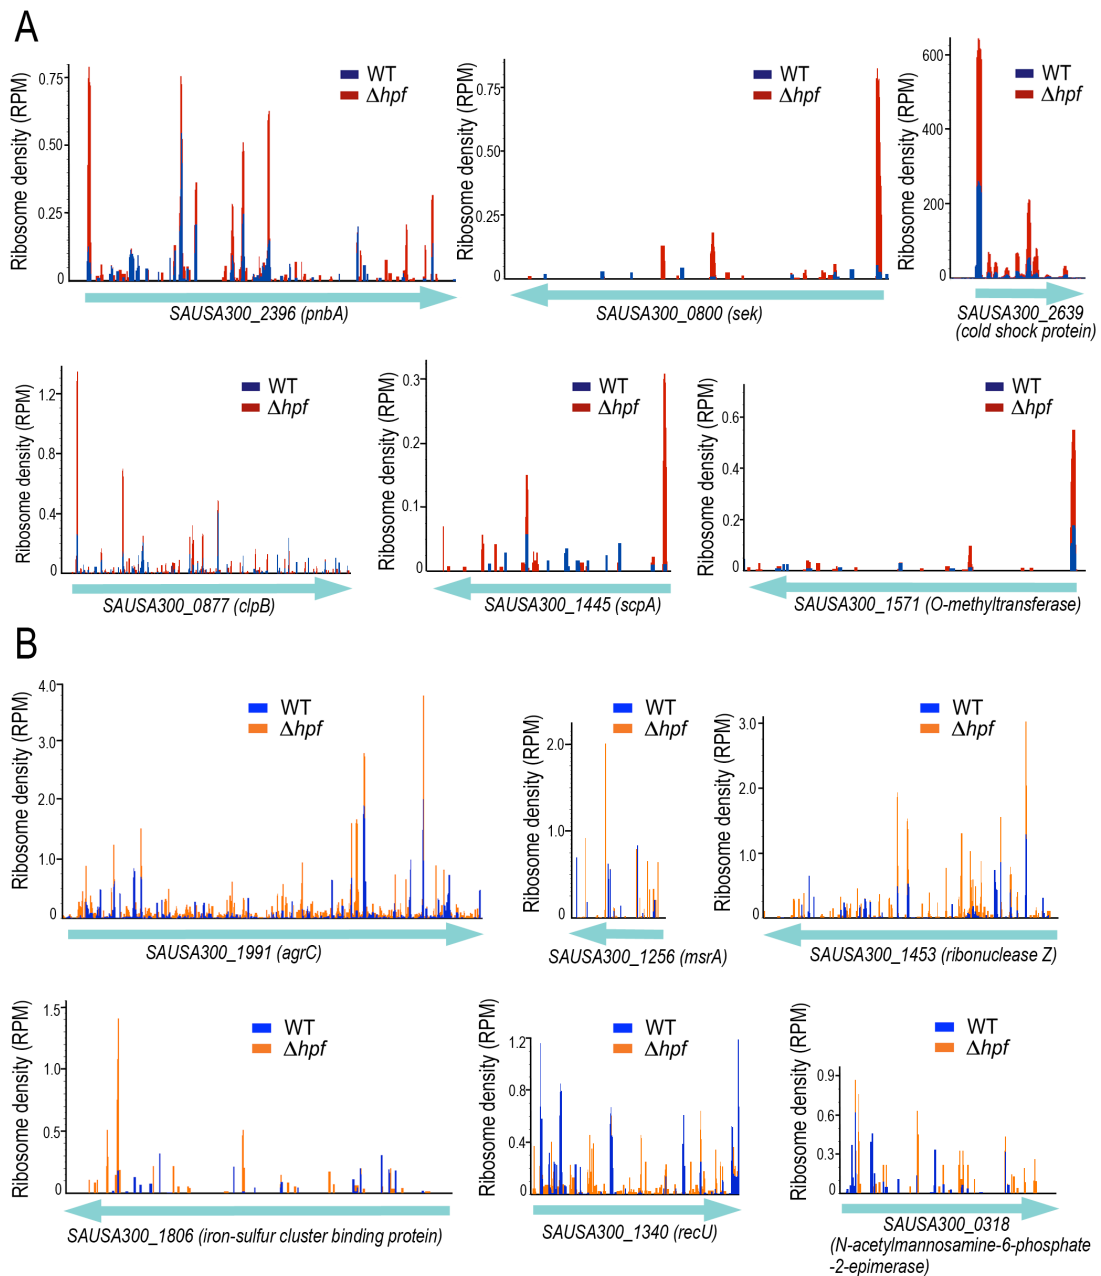

**Figure S6. Examples of ribosome density plots showing differentially up-regulated translation in the *hpf<sub>sa</sub>* mutant. (A) Minimal medium (MM) samples. (B) Tryptic soy broth (TSB) samples. Ribosome occupancy around start codons is accentuated in MM samples.**

## SUPPLEMENTARY REFERENCES

1. Polikanov, Y.S., Blaha, G.M. and Steitz, T.A. (2012) How hibernation factors RMF, HPF, and YfiA turn off protein synthesis. *Science*, **336**, 915-918.
2. Del Campo, C., Bartholomaeus, A., Fedyunin, I. and Ignatova, Z. (2015) Secondary structure across the bacterial transcriptome reveals versatile roles in mRNA regulation and function. *PLoS Genet*, **11**, e1005613.

**Table S1.** Summary of sixteen ribosome profiling and total mRNA sequencing libraries reported in this study.

| Growth Media <sup>a</sup> | Replicate | Sequencing type <sup>b</sup> | Genotype <sup>c</sup> | Sample name | Mapped reads <sup>d</sup> | Replicates correlation | R square <sup>e</sup> |
|---------------------------|-----------|------------------------------|-----------------------|-------------|---------------------------|------------------------|-----------------------|
| MM                        | Rep 1     | RPF                          | WT                    | YP1         | 7,631,866                 | vs. YP5                | 0.892                 |
|                           |           |                              | $\Delta hpf$          | YP2         | 41,393,905                | vs. YP6                | 0.967                 |
|                           |           | Total mRNA                   | WT                    | YP3         | 39,255,811                | vs. YP7                | 0.912                 |
|                           |           |                              | $\Delta hpf$          | YP4         | 25,666,379                | vs. YP8                | 0.923                 |
|                           | Rep 2     | RPF                          | WT                    | YP5         | 9,723,245                 |                        |                       |
|                           |           |                              | $\Delta hpf$          | YP6         | 14,128,482                |                        |                       |
|                           |           | Total mRNA                   | WT                    | YP7         | 18,821,122                |                        |                       |
|                           |           |                              | $\Delta hpf$          | YP8         | 22,170,673                |                        |                       |
| TSB                       | Rep 1     | RPF                          | WT                    | YP10        | 3,593,733                 | vs. YP15               | 0.875                 |
|                           |           |                              | $\Delta hpf$          | YP11        | 7,252,593                 | vs. YP16               | 0.845                 |
|                           |           | Total mRNA                   | WT                    | YP12        | 12,674,631                | vs. YP17               | 0.939                 |
|                           |           |                              | $\Delta hpf$          | YP13        | 23,767,550                | vs. YP18               | 0.910                 |
|                           | Rep 2     | RPF                          | WT                    | YP15        | 10,887,256                |                        |                       |
|                           |           |                              | $\Delta hpf$          | YP16        | 4,580,635                 |                        |                       |
|                           |           | Total mRNA                   | WT                    | YP17        | 26,776,849                |                        |                       |
|                           |           |                              | $\Delta hpf$          | YP18        | 26,859,982                |                        |                       |

<sup>a</sup> MM, minimal medium; TSB, tryptic soy broth

<sup>b</sup> RPF, ribosome-protected footprints

<sup>c</sup> All derived from *S. aureus* USA300 JE2

<sup>d</sup> unique reads that mapped to the *S. aureus* USA300 genome (GenBank CP000255.1) using Bowtie v.0.12.0, excluding rRNA and tRNA. Two mismatches were allowed.

<sup>e</sup> squared correlation coefficient of replicate 1 and 2 from the same sample type.

**Table S2. List of genes whose translation efficiency (TE) is increased in MM grown  $\Delta$ hpf mutant relative to the wild-type.**

Only genes that are translationally upregulated by  $\geq 2$ -fold in the two independent biological replicates are confident.

Data shown is from replicate 2. Known virulence factors are highlighted in blue

| Gene Locus    | $\Delta$ hpf_log2 TE | WT_log2 TE | log 2 $\Delta$ TE ( $\Delta$ hpf-WT) | gene/ gene product                                  |
|---------------|----------------------|------------|--------------------------------------|-----------------------------------------------------|
| SAUSA300_2028 | -1.681               | -5.042     | 3.360                                | acpS                                                |
| SAUSA300_0985 | -0.806               | -3.487     | 2.681                                | conserved hypothetical protein                      |
| SAUSA300_1461 | 2.571                | 0.073      | 2.499                                | conserved hypothetical protein hypothetical protein |
| SAUSA300_2294 | 2.132                | -0.280     | 2.412                                | conserved hypothetical protein                      |
| SAUSA300_2211 | -2.203               | -4.593     | 2.390                                | putative membrane                                   |
| SAUSA300_0427 | -1.204               | -3.520     | 2.316                                | conserved hypothetical protein hypothetical protein |
| SAUSA300_2295 | 0.487                | -1.813     | 2.300                                | conserved hypothetical protein hypothetical protein |
| SAUSA300_0507 | 0.397                | -1.862     | 2.259                                | ctsR                                                |
| SAUSA300_1010 | -1.153               | -3.383     | 2.230                                | conserved hypothetical protein                      |
| SAUSA300_2647 | -0.902               | -3.050     | 2.148                                | rnpA                                                |
| SAUSA300_1528 | -0.552               | -2.671     | 2.120                                | cdd                                                 |
| SAUSA300_2528 | -0.136               | -2.253     | 2.118                                | conserved hypothetical protein                      |
| SAUSA300_0800 | -0.145               | -2.213     | 2.068                                | sek enterotoxin                                     |
| SAUSA300_1627 | 1.849                | -0.215     | 2.065                                | infC, IF3                                           |
| SAUSA300_0904 | -1.285               | -3.342     | 2.057                                | protozoan regulator                                 |
| SAUSA300_2232 | -0.778               | -2.829     | 2.051                                | acetyltransferase                                   |
| SAUSA300_1577 | -0.643               | -2.654     | 2.011                                | TPR(tetratricopeptide) family protein               |
| SAUSA300_0493 | -1.511               | -3.522     | 2.011                                | folB, dihydroneopterin aldolase                     |
| SAUSA300_1176 | -0.032               | -1.979     | 1.947                                | pgsA, CDP-diacylglycerol--glycerol-3-phosphate      |
| SAUSA300_2004 | 0.201                | -1.743     | 1.943                                | conserved hypothetical protein                      |
| SAUSA300_1705 | -1.289               | -3.226     | 1.938                                | putative drug transporter                           |
| SAUSA300_1571 | -1.792               | -3.718     | 1.927                                | O-methyltransferase family                          |
| SAUSA300_0832 | -0.094               | -1.925     | 1.831                                | conserved hypothetical protein                      |
| SAUSA300_1361 | -0.474               | -2.299     | 1.826                                | conserved hypothetical protein                      |
| SAUSA300_0729 | 0.230                | -1.578     | 1.808                                | integral membrane protein                           |

|               |        |        |       |                                 |
|---------------|--------|--------|-------|---------------------------------|
| SAUSA300_1368 | -0.205 | -1.994 | 1.790 | ansA                            |
| SAUSA300_1970 | 0.698  | -1.072 | 1.770 | putative exonuclease            |
| SAUSA300_0359 | -1.727 | -3.486 | 1.759 | transulfuration enzyme          |
| SAUSA300_2551 | -1.054 | -2.792 | 1.738 | nrdD                            |
| SAUSA300_0017 | -0.501 | -2.235 | 1.734 | purA                            |
| SAUSA300_2459 | 1.620  | -0.095 | 1.715 | marR                            |
| SAUSA300_1190 | 0.344  | -1.371 | 1.715 | glpP                            |
| SAUSA300_0521 | 0.043  | -1.661 | 1.704 | nusG                            |
| SAUSA300_2352 | -1.835 | -3.528 | 1.694 | Txe/YoeB AT                     |
| SAUSA300_2396 | 0.830  | -0.850 | 1.680 | pnbA, para-nitrobenzyl esterase |
| SAUSA300_2252 | 0.453  | -1.227 | 1.680 | conserved hypothetical protein  |
| SAUSA300_2266 | 2.727  | 1.062  | 1.666 | conserved hypothetical protein  |
| SAUSA300_2392 | 0.304  | -1.359 | 1.663 | OpuCb                           |
| SAUSA300_1796 | 0.212  | -1.445 | 1.656 | conserved hypothetical protein  |
| SAUSA300_2527 | 0.406  | -1.226 | 1.632 | conserved hypothetical protein  |
| SAUSA300_2402 | 2.508  | 0.879  | 1.628 | conserved hypothetical protein  |
| SAUSA300_2031 | 0.033  | -1.567 | 1.600 | conserved hypothetical protein  |
| SAUSA300_1473 | -1.852 | -3.451 | 1.599 | nusB                            |
| SAUSA300_1185 | -1.830 | -3.427 | 1.597 | miaA                            |
| SAUSA300_2303 | -3.300 | -4.880 | 1.580 | tcaR                            |
| SAUSA300_2430 | 0.373  | -1.204 | 1.577 | lipoprotein                     |
| SAUSA300_0730 | -0.857 | -2.414 | 1.556 | GGDEF domainprotein             |
| SAUSA300_1882 | 1.332  | -0.214 | 1.545 | gatB                            |
| SAUSA300_0542 | 0.657  | -0.882 | 1.539 | deoxynucleoside kinase          |
| SAUSA300_0780 | -0.523 | -2.058 | 1.536 | conserved hypothetical protein  |
| SAUSA300_0695 | -1.330 | -2.836 | 1.506 | radical activating enzyme       |
| SAUSA300_2233 | 1.424  | -0.075 | 1.499 | BioY                            |
| SAUSA300_1152 | 0.860  | -0.618 | 1.478 | rrf                             |
| SAUSA300_0117 | 0.912  | -0.562 | 1.474 | sirA                            |
| SAUSA300_2300 | -1.437 | -2.905 | 1.468 | tetR regulator                  |



|                               |                       |                        |                       |                                           |
|-------------------------------|-----------------------|------------------------|-----------------------|-------------------------------------------|
| SAUSA300_2040                 | -1.838                | -3.309                 | 1.471                 | putative membrane protein                 |
| SAUSA300_1313                 | -1.879                | -3.332                 | 1.453                 | ctpA                                      |
| SAUSA300_0910                 | -2.240                | -3.690                 | 1.450                 | mgtE                                      |
| SAUSA300_1512                 | -2.198                | -3.645                 | 1.448                 | pbp3, penicillin binding                  |
| SAUSA300_2504                 | -3.354                | -4.801                 | 1.447                 | acyltransferase                           |
| SAUSA300_2064                 | -1.270                | -2.710                 | 1.440                 | atpB                                      |
| SAUSA300_0536                 | 1.218                 | -0.220                 | 1.438                 | DJ-1/Pfp1 family protein                  |
| SAUSA300_0249                 | 1.486                 | 0.049                  | 1.437                 | cytidinyltransferase                      |
| SAUSA300_0785                 | -0.993                | -2.425                 | 1.432                 | acetyltransferase                         |
| SAUSA300_0006                 | -2.218                | -3.632                 | 1.414                 | gyrA                                      |
| SAUSA300_0671                 | -3.452                | -4.852                 | 1.400                 | ABC-transporter                           |
| SAUSA300_2258                 | -0.465                | -1.862                 | 1.398                 | formate dehydrogenase                     |
| SAUSA300_2422                 | 1.886                 | 0.514                  | 1.372                 | oxidoreductase                            |
| SAUSA300_1542                 | -1.226                | -2.595                 | 1.369                 | hrcA                                      |
| SAUSA300_2067                 | 0.388                 | -0.978                 | 1.366                 | glyA                                      |
| SAUSA300_0928                 | 1.191                 | -0.172                 | 1.363                 | comK                                      |
| SAUSA300_1569                 | -1.603                | -2.959                 | 1.356                 | peptidase                                 |
| SAUSA300_1665                 | 1.103                 | -0.247                 | 1.350                 | conserve                                  |
| SAUSA300_1201                 | -0.581                | -1.904                 | 1.323                 | glnA                                      |
| SAUSA300_1570                 | -1.050                | -2.369                 | 1.320                 | peptidase                                 |
| <a href="#">SAUSA300_2353</a> | <a href="#">0.806</a> | <a href="#">-0.511</a> | <a href="#">1.316</a> | <a href="#">Txe/YoeB toxin-antitoxin</a>  |
| SAUSA300_1916                 | -1.131                | -2.446                 | 1.315                 | aminotransferase                          |
| SAUSA300_0963                 | -1.986                | -3.300                 | 1.313                 | qoxA                                      |
| SAUSA300_1669                 | 0.369                 | -0.939                 | 1.308                 | aminotransferase                          |
| SAUSA300_1518                 | 0.298                 | -1.007                 | 1.305                 | ATP RNA helicase                          |
| SAUSA300_2130                 | -0.925                | -2.224                 | 1.299                 | UTP-glucose-1-phosphate uridyltransferase |
| SAUSA300_2066                 | 0.940                 | -0.352                 | 1.291                 | uracyl phosphosribosyltransferase         |
| <a href="#">SAUSA300_2639</a> | <a href="#">3.699</a> | <a href="#">2.411</a>  | <a href="#">1.287</a> | <a href="#">cold shock protein, csp</a>   |
| SAUSA300_1803                 | -1.768                | -3.055                 | 1.287                 | conserved hypothetical protein            |
| SAUSA300_1445                 | -2.047                | -3.328                 | 1.281                 | scpA                                      |

|                               |                        |                        |                       |                                                |
|-------------------------------|------------------------|------------------------|-----------------------|------------------------------------------------|
| SAUSA300_1881                 | -0.849                 | -2.128                 | 1.278                 | gatA                                           |
| <a href="#">SAUSA300_2467</a> | <a href="#">-0.065</a> | <a href="#">-1.342</a> | <a href="#">1.277</a> | <a href="#">sortase A, srtA</a>                |
| SAUSA300_1238                 | 0.743                  | -0.531                 | 1.274                 | conserved hypothetical protein                 |
| SAUSA300_0306                 | -1.998                 | -3.260                 | 1.262                 | brnQ                                           |
| SAUSA300_2622                 | -0.029                 | -1.286                 | 1.257                 | conserved hypothetical protein                 |
| SAUSA300_2544                 | 0.982                  | -0.269                 | 1.252                 | conserved hypothetical protein                 |
| SAUSA300_0816                 | 3.391                  | 2.141                  | 1.250                 | csbD-like protein                              |
| SAUSA300_1475                 | -2.192                 | -3.441                 | 1.250                 | accC                                           |
| SAUSA300_0178                 | -2.780                 | -4.026                 | 1.246                 | conserved hypothetical protein                 |
| SAUSA300_2070                 | -1.069                 | -2.314                 | 1.245                 | conserved hypothetical protein                 |
| SAUSA300_1110                 | -2.208                 | -3.443                 | 1.235                 | sun, ribosome methyltransferase                |
| <a href="#">SAUSA300_1295</a> | <a href="#">3.292</a>  | <a href="#">2.071</a>  | <a href="#">1.222</a> | <a href="#">cold shock protein, CSD family</a> |
| SAUSA300_1449                 | 1.488                  | 0.274                  | 1.214                 | mutT/nudix family                              |
| <a href="#">SAUSA300_0877</a> | <a href="#">0.124</a>  | <a href="#">-1.087</a> | <a href="#">1.211</a> | <a href="#">ClpB</a>                           |
| SAUSA300_1689                 | -1.219                 | -2.429                 | 1.210                 | conserved hypothetical protein                 |
| SAUSA300_1690                 | 0.842                  | -0.366                 | 1.208                 | putative therodoxin                            |
| SAUSA300_0986                 | -1.140                 | -2.346                 | 1.206                 | cytochrome ubiqunol oxidase subunit            |
| SAUSA300_0668                 | 0.934                  | -0.270                 | 1.205                 | conserved hypothetical protein                 |
| SAUSA300_2037                 | -0.250                 | -1.448                 | 1.198                 | RNA helicase                                   |
| SAUSA300_0541                 | 0.108                  | -1.089                 | 1.197                 | deoxynucleoside kinase family                  |
| SAUSA300_0981                 | 0.002                  | -1.191                 | 1.193                 | conserved hypothetical protein                 |
| SAUSA300_0468                 | -1.367                 | -2.556                 | 1.189                 | TatD family hydrolase                          |
| <a href="#">SAUSA300_2249</a> | <a href="#">0.385</a>  | <a href="#">-0.799</a> | <a href="#">1.185</a> | <a href="#">ssaA</a>                           |
| SAUSA300_2648                 | 2.289                  | 1.109                  | 1.181                 | rpmH                                           |
| SAUSA300_1982                 | 0.417                  | -0.762                 | 1.179                 | groL                                           |
| SAUSA300_1548                 | 0.277                  | -0.888                 | 1.166                 | comE                                           |
| SAUSA300_2327                 | 0.707                  | -0.458                 | 1.165                 | conserved hypothetical protein                 |
| SAUSA300_2315                 | 0.958                  | -0.205                 | 1.163                 | putative lipoprotein                           |
| SAUSA300_0377                 | 1.257                  | 0.101                  | 1.156                 | putative lipoprotein                           |
| SAUSA300_1685                 | 0.775                  | -0.376                 | 1.151                 | conserved hypothetical protein                 |

|               |        |        |       |                                                     |
|---------------|--------|--------|-------|-----------------------------------------------------|
| SAUSA300_0865 | 0.629  | -0.521 | 1.150 | pgi, glucose6-phosphate isomerase                   |
| SAUSA300_2297 | -1.326 | -2.475 | 1.149 | conserved hypothetical protein                      |
| SAUSA300_1850 | -1.440 | -2.580 | 1.140 | conserved hypothetical protein                      |
| SAUSA300_1880 | -1.172 | -2.309 | 1.137 | gatB                                                |
| SAUSA300_1182 | -1.876 | -3.013 | 1.137 | pyruvate ferredoxin oxidoreductase, alpha subunit   |
| SAUSA300_2531 | 0.706  | -0.430 | 1.136 | hydrolase                                           |
| SAUSA300_1277 | 0.616  | -0.512 | 1.129 | conserved hypothetical protein                      |
| SAUSA300_2529 | 1.056  | -0.070 | 1.126 | conserved hypothetical protein                      |
| SAUSA300_1144 | -1.576 | -2.688 | 1.112 | gid                                                 |
| SAUSA300_0959 | -1.431 | -2.541 | 1.110 | fmt                                                 |
| SAUSA300_1103 | 2.286  | 1.178  | 1.108 | rpoZ                                                |
| SAUSA300_1167 | 0.617  | -0.491 | 1.108 | pnpA                                                |
| SAUSA300_1086 | 0.632  | -0.472 | 1.105 | putative cell division initiation protein           |
| SAUSA300_1647 | -0.596 | -1.700 | 1.104 | accD                                                |
| SAUSA300_1659 | 2.010  | 0.912  | 1.098 | tpx                                                 |
| SAUSA300_1508 | 1.359  | 0.264  | 1.094 | conserved hypothetical protein                      |
| SAUSA300_2002 | -1.076 | -2.169 | 1.093 | glycoprotein endopeptidase                          |
| SAUSA300_1844 | 1.696  | 0.611  | 1.085 | bacterioferritin                                    |
| SAUSA300_1364 | 0.004  | -1.079 | 1.083 | engA                                                |
| SAUSA300_2057 | -1.511 | -2.587 | 1.075 | atpC                                                |
| SAUSA300_1911 | 0.482  | -0.585 | 1.068 | ABC transporter                                     |
| SAUSA300_0839 | 1.024  | -0.040 | 1.064 | conserved hypothetical protein hypothetical protein |
| SAUSA300_0619 | -1.954 | -3.010 | 1.056 | ABC transporter                                     |
| SAUSA300_0556 | -3.242 | -4.295 | 1.053 | SIS domain protein                                  |
| SAUSA300_1080 | 1.110  | 0.058  | 1.052 | ftsZ                                                |
| SAUSA300_1476 | 0.044  | -1.007 | 1.051 | accB                                                |
| SAUSA300_0790 | 1.739  | 0.690  | 1.049 | putative arsenate reductase                         |
| SAUSA300_1686 | -2.191 | -3.238 | 1.047 | murC                                                |
| SAUSA300_0709 | -2.041 | -3.069 | 1.027 | 5'(3')deoxyribonucleotidase                         |
| SAUSA300_1889 | -0.918 | -1.936 | 1.019 | purB                                                |

|               |        |        |       |                             |
|---------------|--------|--------|-------|-----------------------------|
| SAUSA300_1579 | -1.452 | -2.466 | 1.014 | aminotransferase, classV    |
| SAUSA300_0380 | 1.514  | 0.510  | 1.005 | ahpC                        |
| SAUSA300_1197 | 0.800  | -0.200 | 1.000 | gluthathione peroxidase     |
| SAUSA300_0912 | -0.002 | -0.995 | 0.993 | trans-2-enoyl-ACP-reductase |

**Table S3. List of genes whose translation efficiency (TE) is increased in TSB grown  $\Delta$ hpf mutant relative to the wild-type.**

Only genes that are translationally upregulated by  $\geq 2$ -fold in the two independent biological replicates are confident.

Data shown is from replicate 2. Known virulence factors are highlighted in blue

| Gene Locus    | $\Delta$ hpf_log2 TE | WT_log2 TE | log 2 $\Delta$ TE ( $\Delta$ hpf-WT) | gene/ gene product                                  |
|---------------|----------------------|------------|--------------------------------------|-----------------------------------------------------|
| SAUSA300_2437 | 2.079                | -0.414     | 2.494                                | sarT                                                |
| SAUSA300_1573 | -2.074               | -4.558     | 2.485                                | conserved hypothetical protein hypothetical protein |
| SAUSA300_0363 | -0.655               | -3.001     | 2.346                                | conserved hypothetical protein hypothetical protein |
| SAUSA300_0529 | -2.271               | -5.757     | 3.486                                | conserved hypothetical protein                      |
| SAUSA300_2481 | -2.936               | -6.050     | 3.114                                | conserved hypothetical protein                      |
| SAUSA300_1891 | -1.269               | -3.280     | 2.011                                | conserved hypothetical protein                      |
| SAUSA300_1599 | -1.786               | -3.768     | 1.983                                | PheB                                                |
| SAUSA300_1602 | -2.079               | -4.019     | 1.940                                | conserved hypothetical protein                      |
| SAUSA300_0840 | 1.024                | -0.884     | 1.908                                | conserved hypothetical protein                      |
| SAUSA300_1326 | 2.264                | 0.367      | 1.897                                | EbsB, cell wall enzyme                              |
| SAUSA300_1200 | -1.614               | -3.486     | 1.872                                | glnR                                                |
| SAUSA300_2514 | 2.398                | 0.621      | 1.777                                | conserved hypothetical protein                      |
| SAUSA300_0810 | 1.165                | -0.591     | 1.757                                | conserved hypothetical protein                      |
| SAUSA300_2511 | 2.777                | 1.046      | 1.731                                | conserved hypothetical protein                      |
| SAUSA300_2071 | -2.361               | -4.083     | 1.722                                | HemK methyltransferase family                       |
| SAUSA300_1091 | 0.263                | -1.451     | 1.714                                | pyrR (bifunctional protein)                         |
| SAUSA300_0771 | 2.305                | 0.622      | 1.684                                | acetyltransferase                                   |
| SAUSA300_1915 | 0.321                | -1.335     | 1.657                                | conserved hypothetical protein                      |
| SAUSA300_1256 | -1.038               | -2.675     | 1.637                                | msrA, peptide methionine sulfoxide reductase        |
| SAUSA300_1334 | -0.116               | -1.671     | 1.555                                | putative membrane protein                           |
| SAUSA300_1343 | -0.141               | -1.692     | 1.551                                | nth, endonuclease III                               |
| SAUSA300_1050 | 0.970                | -0.569     | 1.539                                | purine NTP pyrophosphatase                          |
| SAUSA300_1097 | 0.235                | -1.237     | 1.472                                | pyrF                                                |
| SAUSA300_2043 | 0.440                | -1.032     | 1.472                                | conserved hypothetical protein                      |
| SAUSA300_1340 | -1.910               | -3.370     | 1.460                                | recU                                                |

|                               |                        |                        |                       |                                                   |
|-------------------------------|------------------------|------------------------|-----------------------|---------------------------------------------------|
| SAUSA300_0767                 | 0.479                  | -0.968                 | 1.447                 | conserved hypothetical protein                    |
| SAUSA300_2143                 | 0.268                  | -1.163                 | 1.431                 | conserved hypothetical protein                    |
| SAUSA300_0518                 | -1.287                 | -2.712                 | 1.425                 | conserved hypothetical protein                    |
| SAUSA300_0070                 | 1.742                  | 0.370                  | 1.371                 | lysophospholipase                                 |
| <a href="#">SAUSA300_1991</a> | <a href="#">-2.688</a> | <a href="#">-4.079</a> | <a href="#">1.391</a> | <a href="#">agrC, accessory gene regulator C</a>  |
| SAUSA300_0432                 | 0.405                  | -0.964                 | 1.369                 | sodium transporter                                |
| SAUSA300_1196                 | 0.463                  | -0.898                 | 1.361                 | hfq                                               |
| SAUSA300_2065                 | -1.888                 | -3.246                 | 1.358                 | UDP..epimerase                                    |
| SAUSA300_1236                 | -1.811                 | -3.157                 | 1.346                 | conserved hypothetical protein                    |
| SAUSA300_1026                 | -0.853                 | -2.192                 | 1.339                 | conserved hypothetical protein                    |
| SAUSA300_2547                 | 1.392                  | 0.056                  | 1.336                 | conserved hypothetical protein                    |
| SAUSA300_0552                 | 0.542                  | -0.787                 | 1.329                 | conserved hypothetical protein                    |
| SAUSA300_0657                 | 1.459                  | 0.180                  | 1.278                 | conserved hypothetical protein                    |
| SAUSA300_1909                 | 2.282                  | 1.010                  | 1.273                 | conserved hypothetical protein                    |
| SAUSA300_1806                 | -1.160                 | -2.421                 | 1.261                 | putative iron-sulfur cluster binding protein      |
| SAUSA300_2355                 | -0.106                 | -1.367                 | 1.261                 | putative lipoprotein                              |
| SAUSA300_1198                 | -0.050                 | -1.306                 | 1.256                 | putative GTP-binding protein                      |
| SAUSA300_1872                 | 0.229                  | -1.014                 | 1.243                 | conserved hypothetical protein                    |
| SAUSA300_1453                 | -0.134                 | -1.372                 | 1.238                 | ribonuclease Z                                    |
| SAUSA300_0223                 | 1.610                  | 0.388                  | 1.222                 | conserved hypothetical protein                    |
| SAUSA300_1099                 | -0.433                 | -1.654                 | 1.221                 | conserved hypothetical protein                    |
| SAUSA300_1222                 | 1.102                  | -0.114                 | 1.217                 | nuc, thermonuclease                               |
| SAUSA300_0318                 | 0.774                  | -0.427                 | 1.201                 | N-acetylmannosamine-6-phosphate-2-epimerase       |
| <a href="#">SAUSA300_2503</a> | <a href="#">1.745</a>  | <a href="#">0.545</a>  | <a href="#">1.199</a> | <a href="#">ssaA, secretory antigen precursor</a> |
| SAUSA300_2331                 | 0.380                  | -0.804                 | 1.183                 | marR                                              |
| SAUSA300_1316                 | 0.586                  | -0.585                 | 1.171                 | msrB                                              |
| SAUSA300_1632                 | 0.941                  | -0.209                 | 1.149                 | conserved hypothetical protein                    |
| SAUSA300_1800                 | 0.600                  | -0.544                 | 1.145                 | RluD family protein, pseudouridine synthase       |
| SAUSA300_1795                 | 2.733                  | 1.597                  | 1.136                 | conserved hypothetical protein                    |
| <a href="#">SAUSA300_0224</a> | <a href="#">0.981</a>  | <a href="#">-0.137</a> | <a href="#">1.118</a> | <a href="#">coa, staphylocoagulase precursor</a>  |

|               |        |        |       |                                          |
|---------------|--------|--------|-------|------------------------------------------|
| SAUSA300_1021 | 0.690  | -0.424 | 1.115 | conserved hypothetical protein           |
| SAUSA300_1594 | 2.601  | 1.493  | 1.109 | yajC                                     |
| SAUSA300_0003 | 1.241  | 0.136  | 1.106 | conserved hypothetical protein           |
| SAUSA300_1904 | 2.382  | 1.281  | 1.101 | conserved hypothetical protein           |
| SAUSA300_2644 | -0.785 | -1.881 | 1.096 | gidB, glucose-inhibited division protein |
| SAUSA300_1305 | 0.382  | -0.713 | 1.095 | sucB                                     |
| SAUSA300_1101 | 0.129  | -0.966 | 1.095 | fibronectin                              |
| SAUSA300_1801 | 1.190  | 0.095  | 1.095 | fumC                                     |
| SAUSA300_1596 | -1.005 | -2.092 | 1.088 | queA                                     |
| SAUSA300_2504 | -1.331 | -2.417 | 1.086 | acyltransferase                          |
| SAUSA300_1534 | -1.282 | -2.364 | 1.081 | conserved hypothetical protein           |
| SAUSA300_1452 | 1.383  | 0.302  | 1.081 | proC                                     |
| SAUSA300_0993 | 2.055  | 0.974  | 1.080 | pdhA                                     |
| SAUSA300_0367 | -1.103 | -2.184 | 1.080 | ssb, single strand binding protein       |
| SAUSA300_2219 | -0.419 | -1.432 | 1.013 | moaA                                     |
| SAUSA300_1605 | 0.546  | -0.464 | 1.010 | mreC                                     |
| SAUSA300_1505 | -1.336 | -2.334 | 0.997 | conserved hypothetical protein           |
| SAUSA300_1597 | -1.176 | -2.169 | 0.993 | ruvB                                     |
| SAUSA300_2252 | 1.286  | 0.294  | 0.992 | conserved hypothetical protein           |
